RESEARCH ARTICLE

# Transcriptome analysis of differentially expressed genes involved in selenium accumulation in tea plant (*Camellia sinensis*)

Dan Cao<sup>1</sup>, Yanli Liu<sup>1</sup>, Linlong Ma<sup>1</sup>, Xiaofang Jin<sup>1\*</sup>, Guiyi Guo<sup>2\*</sup>, Rongrong Tan<sup>1</sup>, Zheng Liu<sup>1</sup>, Lin Zheng<sup>1</sup>, Fei Ye<sup>1</sup>, Wei Liu<sup>2</sup>

**1** Fruit and Tea Research Institute, Hubei Academy of Agricultural Sciences, Wuhan, Hubei, China, **2** Henan Key Laboratory of Tea Comprehensive utilization in South Henan, Xinyang Agriculture and Forestry University, Xinyang, Henan, China

\* [xfjin@126.com](mailto:xfjin@126.com)(XJ); [ggy6363@aliyun.com](mailto:ggy6363@aliyun.com)(GG)

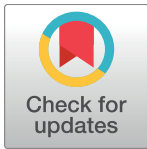

**OPEN ACCESS**

**Citation:** Cao D, Liu Y, Ma L, Jin X, Guo G, Tan R, et al. (2018) Transcriptome analysis of differentially expressed genes involved in selenium accumulation in tea plant (*Camellia sinensis*). PLoS ONE 13(6): e0197506. <https://doi.org/10.1371/journal.pone.0197506>

**Editor:** Xiang Jia Min, Youngstown State University, UNITED STATES

**Received:** November 20, 2017

**Accepted:** May 3, 2018

**Published:** June 1, 2018

**Copyright:** © 2018 Cao et al. This is an open access article distributed under the terms of the [Creative Commons Attribution License](https://creativecommons.org/licenses/by/4.0/), which permits unrestricted use, distribution, and reproduction in any medium, provided the original author and source are credited.

**Data Availability Statement:** The raw data were deposited in NCBI database with the accession number of SRP124749. This Transcriptome Shotgun Assembly project has been deposited at DDBJ/EMBL/GenBank under the accession GGNW00000000. The version described in this paper is the first version, GGNW01000000.

**Funding:** The work was supported by the Innovation Center Fund for Agricultural Science and Technology in Hubei Province of China (2016-620-000-001-032), the Fund of Hubei Academy of

## Abstract

Tea plant (*Camellia sinensis*) has strong enrichment ability for selenium (Se). Selenite is the main form of Se absorbed and utilized by tea plant. However, the mechanism of selenite absorption and accumulation in tea plant is still unknown. In this study, RNA sequencing (RNA-seq) was used to perform transcriptomic analysis on the molecular mechanism of selenite absorption and accumulation in tea plant. 397.98 million high-quality reads were obtained and assembled into 168,212 unigenes, 89,605 of which were extensively annotated. There were 60,582 and 1,362 differentially expressed genes (DEGs) in roots and leaves, respectively. RNA-seq results were further validated by quantitative RT-PCR. Based on GO terms, the unigenes were mainly involved in cell, binding and metabolic process. KEGG pathway enrichment analysis showed that predominant pathways included ribosome and protein processing in endoplasmic reticulum. Further analysis revealed that sulfur metabolism, glutathione metabolism, selenocompound metabolism and plant hormone signal transduction responded to selenite in tea plant. Additionally, a large number of genes of higher expressions associated with phosphate transporters, sulfur assimilation, antioxidant enzymes, antioxidant substances and responses to ethylene and jasmonic acid were identified. Stress-related plant hormones might play a signaling role in promoting sulfate/selenite uptake and assimilation in tea plant. Moreover, some other Se accumulation mechanisms of tea plant were found. Our study provides a possibility for controlling Se accumulation in tea plant through bio-technologies and will be helpful for breeding new tea cultivars.

## Introduction

Selenium (Se) is an essential micronutrient for human and animals. However, there is a very narrow concentration margin between harmful and beneficial doses of Se [1]. Excessive Se can cause poisoning [2], while Se deficiency may result in some endemic diseases such as Kashin-

Agricultural Science (2018NKYJJ12) and the Open Fund of Henan Key Laboratory of Tea Comprehensive Utilization in South Henan of China (HNKLT0F2017002). The funders had no role in study design, data collection and analysis, decision to publish, or preparation of the manuscript.

**Competing interests:** The authors have declared that no competing interests exist.

Beck disease and Keshan disease [3]. Plants can remove Se from natural or polluted high-Se areas and can improve Se nutrition for human as food sources [4]. On the past years several biofortification experiments on vegetables have been carried out and a large body of evidence concerning the effects of Se supplementation has been collected [5–10]. Tea, one of the most popular non-alcoholic beverages in the world and a cash crop widely cultivated not only in Se-rich areas such as Enshi, Hubei province and Ziyang, Shanxi province but also in Se-deficient areas, contains many medicinal ingredients like tea polyphenols, caffeine and amino acids and can reduce fat, lose weight, lower blood sugar, improve immunity and so on [11–13]. Meanwhile, tea is superior to some plant foods in terms of Se content and can provide effective organic Se for human body [14–17]. However, the mechanisms of Se absorption, transport and metabolism in tea plant are still not clear, and relevant studies will be helpful for Se biofortification and improvement of human nutrition.

Selenate (VI) and selenite (IV) are predominant forms of Se in plants. The forms of Se in soil are greatly affected by redox potential and pH. A study of thermodynamic calculations showed that selenate was the main existence form at the high redox state ( $pE+pH>15.0$ ), and selenite mainly existed in the medium redox range ( $7.5<pE+pH<15.0$ ) [18]. The mechanism of selenate uptake in plants is well understood. Se and sulfur (S) are similar chemically, and selenate was absorbed by sulfate transporters [19–20]. For example, *AtSultr1;2* encoding one of the high-affinity sulphate transporter genes was assayed via isolating *Arabidopsis thaliana* mutants [21]. Several studies have also clarified that *Sultr2*, a low-affinity sulphate transporter gene, was involved in translocation from roots to shoots, irrespective of Se supply or sulfate starvation [22–23]. Unlike selenate, the mechanism of selenite absorption by plants is still unclear. It was found that the absorption of selenite was unaffected by sulphate [24–25]. The genes may be indispensable for both selenate and selenite absorption by roots. Early studies suggested that selenite was assimilated by passive diffusion into roots [26]. Later, another research found that a silicon (Si) influx transporter, *OsNIP2;1* (a nodulin 26-like intrinsic membrane protein subfamily of aquaporins), was related to selenite uptake [27]. However, two phosphate transporters, *OsPT2* and *OsPT8*, were also verified to be associated with the absorption of selenite [28–29]. Till now, there is no unified statement. A gene, *CsSUL3.5*, was cloned from the roots of tea plant. The bioinformatics analysis showed that it belonged to the sulfate transporter family and selenate treatment could induce its expression [30]. In spite of some advances in physiology studies of selenite accumulation in tea plant [31–32], the genes related with selenite uptake, transport and assimilation and the whole gene network are still not well known and expect for further researches.

With the rapid development of next-generation sequencing technologies, RNA-Seq has quickly become a powerful approach for studying transcriptional regulation systematically. In this study, RNA-seq technology was used to identify genes involved in selenite uptake and metabolism in tea plant. Transcriptome analysis was performed on both tender roots and young leaf tissues of tea plant with or without selenite treatment. Our study is not only useful to analyze the molecular mechanism of tea plant in response to selenite but will also be helpful for breeding new tea cultivars.

## Materials and methods

### Experimental materials and culturing conditions

The one-year-old cuttings (Echa 1) were provided by tea germplasm resource nursery in Hubei province. Uniform seedlings were pre-cultured until new roots grew. In early studies, Se concentrations in nutrient solutions varied from 0, 0.015, 0.025, 0.050, 0.100, 0.200 to 0.400 mM. With the enhancement of Se concentration in nutrient solutions, the content of Se in

roots increased gradually. The absorption and accumulation of Se was fast in the low Se concentration range (0.015–0.10 mM). Se could still be taken up in high-Se environment, but at a low rate. However, the absorption rate of Se increased again at very high Se concentrations. This might be because cell membranes were destroyed and Se entered cells directly. However, in spite of this, there were no toxicity symptoms on the leaves (Fig B in S1 Fig). When the concentration of Se was 0.05 mM, tea plants grew best, and the content of Se in roots increased at a very fast rate (Fig A in S1 Fig), which was similar to other studies [32, 33]. Thus, Se was supplied as selenite at this concentration in this study, with zero selenite concentration as the control. Three replicates were performed with 20 seedlings per pot containing 10 L nutrient solution. The nutrient solution was made based on a modified Hoagland's formula [34], that is, 1/3 dilution of a full solution containing 5.00 mM  $\text{Ca}(\text{NO}_3)_2 \cdot 4\text{H}_2\text{O}$ , 5.00 mM  $\text{KNO}_3$ , 1.00 mM  $\text{NH}_4\text{NO}_3$ , 1.00 mM  $\text{KH}_2\text{PO}_4$ , 2.00 mM  $\text{MgSO}_4 \cdot 7\text{H}_2\text{O}$ , 0.10 mM  $\text{FeSO}_4 \cdot 7\text{H}_2\text{O}$ , 0.10 mM  $\text{C}_{10}\text{H}_{14}\text{N}_2\text{Na}_2\text{O}_8 \cdot 2\text{H}_2\text{O}$ , 0.01 mM KI, 0.10 mM  $\text{H}_3\text{BO}_3$ , 0.15 mM  $\text{MnSO}_4$ , 0.03 mM  $\text{ZnSO}_4 \cdot 7\text{H}_2\text{O}$ , 1.00  $\mu\text{M}$   $\text{Na}_2\text{MoO}_4 \cdot 2\text{H}_2\text{O}$ , 0.10  $\mu\text{M}$   $\text{CuSO}_4 \cdot 5\text{H}_2\text{O}$ , 0.20  $\mu\text{M}$   $\text{CoCl}_2$ , with or without 0.05 mM selenite. The pH value was adjusted to 5.0 every day with 1mM HCl or 1mM NaOH. The nutrient solution was aerated continuously and renewed once a week. The experiment was conducted in a greenhouse with a 300–350  $\mu\text{mol m}^{-2}\text{s}^{-1}$  photon flux density for 12 h/d, and at day/night temperature of 30/24°C and relative humidity of 80%. A month later, the bud spread into five new leaves. Seedlings were harvested separately, and the roots were rinsed with the desorption solution. Leaf tissues comprised two leaves and a bud, and tender roots consisted of the latest and the second lateral roots. In the end, all samples were frozen in liquid nitrogen and stored at -80°C.

### Total Se analysis

The roots and leaves were digested for 12 h with concentrated  $\text{HNO}_3\text{-HClO}_4$  (4:1,v/v) at first, and then completely digested at 180°C until the digestion solution became colourless. After cooling, 6 M HCl was added to reduce  $\text{Se}^{6+}$  to  $\text{Se}^{4+}$ . Subsequently, the digested samples were diluted and transferred into a 25 mL volumetric flask with double deionized water. Se concentration was determined with an atomic fluorescence spectrometry (AF-610B, Beijing Ruili Instrument Co., Ltd., China). The standard reference materials and a blank were digested for quality control.

### Determination of hydrogen peroxide ( $\text{H}_2\text{O}_2$ ) content and antioxidant enzymes' activities

In order to determine the content of hydrogen peroxide, 0.5 g roots of the control and treated seedlings were homogenized in an ice bath with 5 mL 0.1% (w/v) trichloroacetic acid. The homogenate was centrifuged at 12000 g for 15 min at 4°C and 0.5 mL of the supernatant was added to 1 mL of 1 M KI and 0.5 mL of 10 mM potassium phosphate buffer (pH 7.0). The absorbance was measured at 390 nm [35].

For the determination of the activities of antioxidant enzymes, 0.5 g roots were homogenized in an ice bath with 4.0 mL of the extraction solution comprising 0.05 M phosphate buffer (pH 7.0), 1.0% (w/v) polyvinylpyrrolidone, 1 mM ethyleneglycol-bis(beta-aminoethylether)-N, N'-tetraacetic acid, 1 mM phenylmethylsulfonyl fluoride, 1 mM dithiothreitol and 0.2% Triton X-100 (v/v). Insoluble materials were removed by centrifugation at 12000 g for 20 min at 4°C. The supernatant was kept at -20°C for further measurement. For the assay of ascorbate peroxidase (APX), 50  $\mu\text{L}$  of the enzyme extract was added to 2.9 mL of the reaction buffer containing 50 mM Tris-HCl (pH 7.0), 0.1 mM ethylenediaminetetraacetic acid and 0.1 mM  $\text{H}_2\text{O}_2$ , and then 50  $\mu\text{L}$  of 30 mM ascorbic acid was added. The absorbance of the mixture was recorded at 290 nm after 10–60 s [36]. For the estimation of glutathione peroxidase (GPX), 50  $\mu\text{L}$  of the

enzyme extract was added to 2.9 mL of the mixture containing 50 mM Tris-HCl (pH 7.0), 0.1 mM ethylenediaminetetraacetic acid, 10 mM guaiacol and 5 mM H<sub>2</sub>O<sub>2</sub>. The absorbance of the mixture was measured at 470 nm after 0.5–3.5 min [37]. For the determination of catalase (CAT), 50 µL of the enzyme extract was added to 2.9 mL of the mixture comprising 50 mM Tris-HCl (pH 7.0) and 0.1 mM ethylenediaminetetraacetic acid, and then 50 µL of 750 mM H<sub>2</sub>O<sub>2</sub> was added. The absorbance of the mixture was measured at 240 nm after 0.5–3.5 min [38].

### RNA isolation, library construction and sequencing for RNA-Seq

The total RNA was extracted from roots and leaf tissues separately using OminiPlant RNA Kit (ComWin Biotech, Beijing, china). The RNA integrity was verified by RNase-free agarose gel electrophoresis, the RNA purity was quantified by Nanodrop 2000 (Thermo, USA), the RNA concentration was measured using a 2100 Bioanalyzer (Agilent Technologies, USA), and each treatment was done in triplicate biologically. All twelve samples had a RNA integrity number (RIN) >7.5, and a RNA concentration ≥100 ng/µL.

The total RNA was extracted and qualified, and an equal amount of RNA (3µg) was used to construct the sequencing library with a NEBNext® Ultra™ Directional RNA Library Prep Kit for Illumina (NEB, USA) according to the manufacturer's recommendations. In brief, mRNA was enriched by Oligo (dT) beads from total RNA at first, and then fragmented into short ones through fragmentation buffer and reversely transcribed into cDNA with random primers. Using DNA polymerase I, dNTP, RNase H and buffer, the second-strand cDNA was synthesized. The cDNA fragments were purified with QiaQuick PCR extraction kit, end repaired, added, and ligated to illumina sequencing adapters. Finally, the products were selected by agarose gel electrophoresis, PCR amplified, and paired-end sequenced with an Illumina HiSeq™2000 system of Gene Denovo Biotechnology Co., Ltd. (Guangzhou, China).

### Sequencing analysis, *de novo* transcripts assembly and functional annotation

After sequencing, raw reads were filtered according to three rules: (1) removing reads containing adapters, (2) removing reads containing more than 10% of unknown uncles, (3) removing low-quality reads containing more than 50% of low-quality (Q-value ≤10) bases. The high-quality clean reads were mapped to ribosome RNA (rRNA) to identify residual rRNA reads. The rRNA removed reads were *de novo* assembled by short reads assembling program-Trinity (v2.1.1) [39], and statistics for length distribution of assembled unigenes were made. The unigene expression was calculated and normalized to RPKM (reads per kb per million reads) [40] based on  $RPKM(A) = (1000000 * C) / (N * L / 1000)$  (where C, N stand for the number of reads uniquely mapped to unigene A and all unigenes respectively, and L stands for the length of unigene A). This approach could eliminate the influences of unigene length and sequencing discrepancies on the calculation of unigene expression. The false discovery rate (FDR) was calculated to adjust the threshold of p value [41]. The unigenes with  $FDR < 0.05$  and  $|\log_2 FC| > 1$  were considered DEGs.

To annotate the unigenes, Blastx program (v2.2.29+) with an E-value threshold of 1e-5 was used to find the unigenes against NCBI non redundant protein (Nr) database, the Swiss-prot protein database, the kyoto encyclopedia of genes and genomes (KEGG) database, and the clusters of orthologous groups (COG) database. According to the best alignment results, protein functional annotations could be obtained. Based on the results of Nr annotation, Gene Ontology (GO) annotation of the unigenes was analyzed by blast2go software [42], and functional classification of the unigenes was performed using WEGO program [43].

### Protein coding region prediction and transcription factor analysis

The unigenes coding sequence (CDS) was predicted by Blastx and ESTscan. At first, the unigenes were aligned by Blastx (E-value cutoff  $10^{-5}$ ) to protein databases in an order of priority from NR, Swiss-prot, KEGG to COG/KOG. Then, the best alignment results were chosen to decide the sequence direction of the unigenes. If a unigene could not match with any protein database, protein coding sequence and sequence direction would be confirmed using ESTScan [44] program. Moreover, HMMER (v3.0) was used to predict transcription factor (TF) based on the plant TF databases [45].

### Real-time quantitative PCR assay

In order to confirm the reliability of RNA-seq results, 15 representative responsive genes were chosen for qRT-PCR using KAPA SYBR® FAST qPCR Master Mix (KAPA Biosystems, Woburn, MA., USA) with an ABI 7500 Real-Time PCR system according to the manufacture’s instructions.  $\beta$ -actin and dehyde-3-phosphate dehydrogenase (GAPDH) were used as reference genes. To derive the relative expression value, the delta-delta CT method [46] was adopted. The sequences of the primers were listed in S1 Table.

## Results

### Se content

Se concentration analysis implied that Se contents in both roots and shoots showed increased significantly with selenite treatment ( $p < 0.01$ ). Moreover, Se content in roots was much higher than that in shoots, which was consistent with the findings in other species (Fig 1) [10, 25, 47–48]. This is probably because selenite can be easily transformed into the organic form in roots once absorbed by plants [49].

### H<sub>2</sub>O<sub>2</sub> content and three antioxidant enzyme activities

H<sub>2</sub>O<sub>2</sub>, a signaling molecule, plays an important role in oxidative response [50], but excessive H<sub>2</sub>O<sub>2</sub> can disrupt the antioxidant enzyme system. APX, CAT and many other compounds of

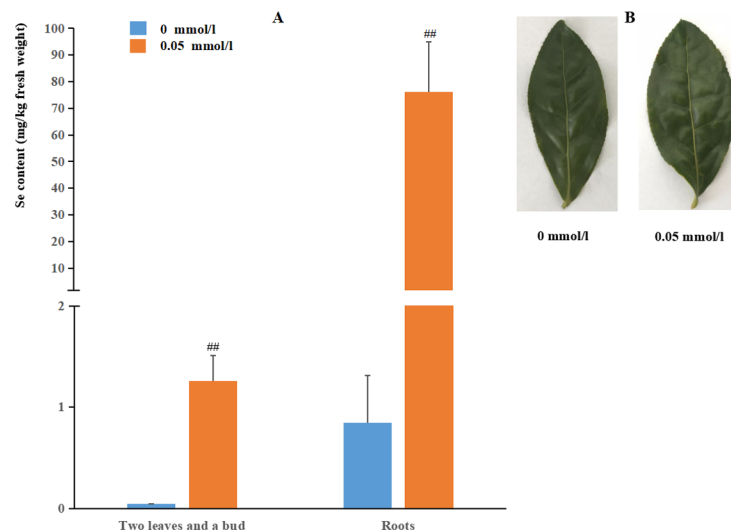

**Fig 1. Changes of tea plants in response to selenite treatment.** (A) Se contents in tea plant roots and leaves between control and treatment groups. ## represents significant difference at 0.01 level. (B) Morphological appearance of tea plant leaves treated with or without selenite.

<https://doi.org/10.1371/journal.pone.0197506.g001>

**Table 1. Effect of selenite treatment on the content of H<sub>2</sub>O<sub>2</sub> and three antioxidant enzyme activities in the roots of tea plants.**

| Selenite concentration (mM) | H <sub>2</sub> O <sub>2</sub> (μg/gFW) | APX(μmol ASA/min/g FW)  | GPX(μmol guaiacol/min/ FW) | CAT(μmol H <sub>2</sub> O <sub>2</sub> /min/g FW) |
|-----------------------------|----------------------------------------|-------------------------|----------------------------|---------------------------------------------------|
| 0                           | 44.953±5.89                            | 1.998±0.25              | 9.626±2.53                 | 10.333±0.00                                       |
| 0.05                        | 18.420±3.52 <sup>##</sup>              | 2.826±0.31 <sup>#</sup> | 12.573±3.66 <sup>##</sup>  | 11.167±0.00                                       |

# represents significant difference at 0.05 level, and

## represents significant difference at 0.01 level

<https://doi.org/10.1371/journal.pone.0197506.t001>

plant cells are important to maintain an appropriate concentration of H<sub>2</sub>O<sub>2</sub> at different developmental stages [51]. Table 1 showed the behaviors of H<sub>2</sub>O<sub>2</sub>, APX, GPX and CAT in the roots of tea plants exposed to two treatments. Selenite treatment resulted in a reduction of H<sub>2</sub>O<sub>2</sub> content. The activities of APX and GPX were improved, whereas the activity of CAT remained almost unchanged with selenite treatment. It has been reported that APX and GPX could reduce H<sub>2</sub>O<sub>2</sub> content [52–53], which could explain the lower level of H<sub>2</sub>O<sub>2</sub> accumulation. Consequently, the higher activities of APX and GPX in the roots in the present study suggested their importance of improving Se tolerance.

### RNA-seq and *de novo* assembly

RNA-Seq of 12 libraries from young leaf tissues and tender roots with and without selenite treatment (three replicates respectively) resulted in 411.22 million reads with more than 95% exhibiting a quality score of Q20 (S2 Table). Using Trinity, 397.98 million high-quality clean reads were *de novo* assembled into 168,212 unigenes (S3 Table) ranging from 201 to 17,995 bp, with a mean length of 677 bp and a N50 length of 997 bp. All unigenes were longer than 200 bp and 54.43% (6,502) of unigenes were longer than 1,000 bp (S2 Fig), which indicated a high-quality sequence, and could be used for further analysis.

### Gene functional annotation and classification

A total of 89,605 unigenes were annotated in the four protein databases, among which 84,807 unigenes were annotated uniquely in NR database, 73,295 unigenes in Swiss-prot database, 64,630 unigenes in COG/KOG database, 48,049 unigenes in KEGG database, respectively. In 168,212 high-quality unigenes, 42,929 (25.52%) unigenes matched with all four databases and 84,807 (50.42%) unigenes matched with at least one database (Fig 2).

The maximum number of BLASTX top hits for the best group representatives was found with *Vitis vinifera* (8.98%), followed by *Theobroma cacao* (3.00%), *Klebsormidium flaccidum* (2.75%), *Chrysochromulina sp. CCMP291* (2.69%), *Nannochloropsis gaditana* (2.61%), and *Galdieria sulphuraria* (2.33%), suggesting that the genome of *Camellia sinensis* was more closely related to *Vitis vinifera* than any other plant genomes.

In the unigene set of tea plants, 64,630 (38.42%) unigenes were categorized into 25 KOG clusters (Fig 3), and the five largest ones were: (1) general function prediction only, (2) post-translational modification, protein turnover, and chaperones, (3) signal transduction mechanisms, (4) translation, ribosomal structure and biogenesis, (5) RNA processing and modification.

### Protein coding sequence prediction and transcription factors analysis

Using the BLASTx protein database, a total of 88,624 unigenes CDSs were tested, among which 6,054 (6.83%) unigenes were longer than 500 bp, and 795 unigenes were longer than 1,000 bp. Another 15,104 unigenes CDSs could not match with the above-mentioned database.

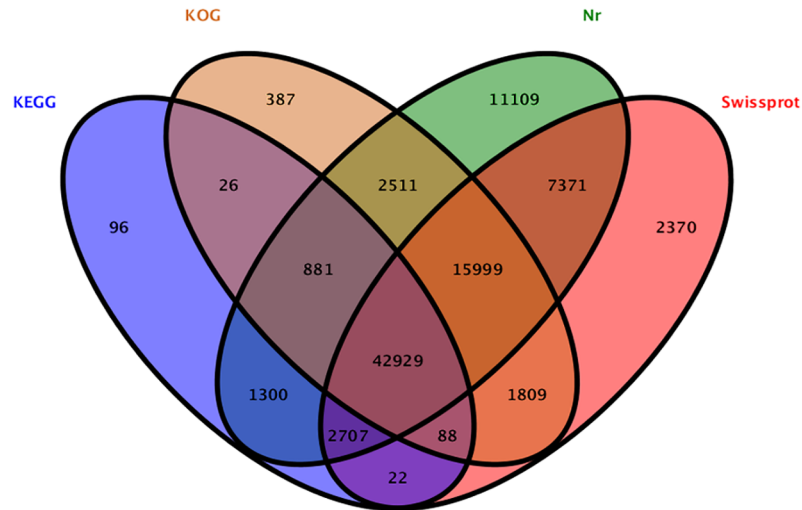

**Fig 2. Venn diagram showing BLAST results of tea plants transcriptome against four databases.** The assembled unigenes were used in BLAST searches against four public databases. The number of unigenes with significant hits against four database is shown at each intersection of Venn diagram.

<https://doi.org/10.1371/journal.pone.0197506.g002>

In total, 2,244 TF genes were identified as Se vs the control, which were classified into 57 families. In terms of the number of genes, top 10 were C2H2, bZIP, bHLH, C3H, MYB\_related, ERF, MYB, NAC, GRAS, WRKY.

### Differentially expressed genes in response to Se

After selenite treatment, 21,588/38,994 genes were up/down-regulated in roots, 231/1,131 DEGs were up/down-regulated in leaves ( $P < 0.05$ , false discovery rate [FDR]  $< 0.05$ ,  $|\log_2FC| > 1$ ) (S3 Fig). Among the significantly expressed genes in roots, only 423 genes were also induced in leaves, of which 174/249 genes were up- and down-regulated. The difference of DEGs

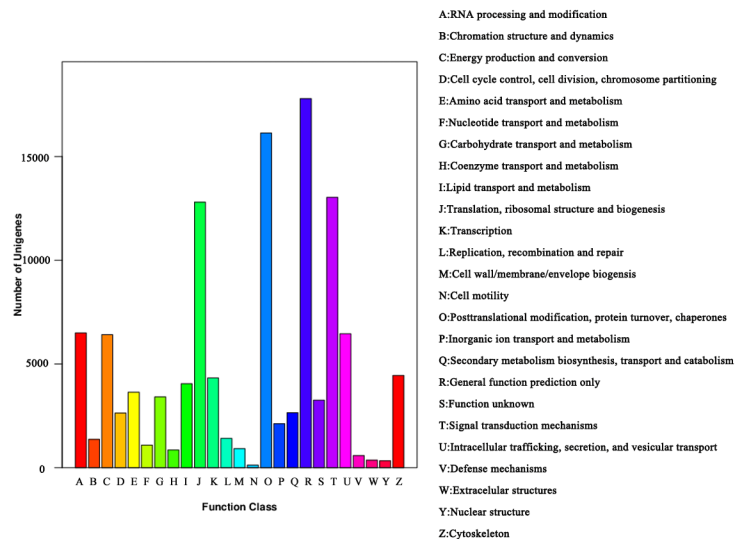

**Fig 3. KOG functional classification of tea plants transcriptome.** In total, 64,630 unigenes were classified into 25 KOG clusters. y-axis represents the number of unigenes, and the capital letters on x-axis represent KOG categories as listed at right of histogram.

<https://doi.org/10.1371/journal.pone.0197506.g003>

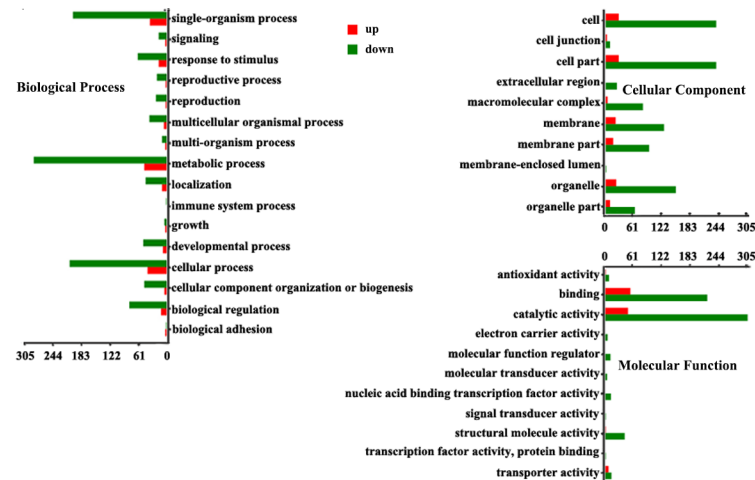

**Fig 4. Function classifications of GO terms of tea plant roots transcripts.** The x-axis indicates the number of genes in a subcategory, and the y-axis indicates the different subcategories.

<https://doi.org/10.1371/journal.pone.0197506.g004>

indicated that the genes in response to selenite were different in roots and leaves. More genes were found in roots than in leaves, which reflected the stimuli imposed by selenite as it was transported in root cells. After all, the roots were where selenite was first perceived by plants.

### GO enrichment analysis of differentially expressed genes

Based on GO terms, a total of 53,131 unigenes could be classified into 3 gene ontology (GO) categories, i.e., biological process, molecular function and cellular component. There were more unigenes classified into cellular component than the other two categories. GO enrichment analysis of DEGs found that the most enriched ones were metabolic process, catalytic activity, and cell in both roots and leaves (Fig 4 and S4 Fig)

### KEGG pathway enrichment analysis of DEGs

KEGG pathway enrichment analysis was performed on the up- and down-regulated genes. In leaves, the up- and down-regulated genes were enriched on 39 and 67 pathways, respectively. The pathways where the up-regulated genes were mostly enriched were carbon metabolism (3 unigenes), nitrogen metabolism (2 unigenes) and phenylpropanoid biosynthesis (2 unigenes) (Fig 5A), and the pathways where the down-regulated genes were mostly enriched were ribosome (55 unigenes), oxidative phosphorylation (20 unigenes) and phenylpropanoid biosynthesis (11 unigenes) (Fig 5B). In roots, the up- and down-regulated genes were enriched on 126 and 127 metabolic pathways, respectively. The pathways for significant enrichment of the up-regulated genes were ribosome (1664 unigenes), oxidative phosphorylation (366 unigenes) and phagosome (327 unigenes) (Fig 5C), while the pathways for significant enrichment of the down-regulated genes were ribosome (2121 unigenes), protein processing in endoplasmic reticulum (664 unigenes) and endocytosis (463 unigenes) (Fig 5D). DEGs in both roots and leaves were mainly enriched in ribosome (52 unigenes) and oxidative phosphorylation (14 unigenes). It is noteworthy that 46, 164, 40, 169, 63, 112 of the up-regulated genes in roots were respectively enriched in sulfur metabolism, cysteine and methionine metabolism, selenocompound metabolism, glutathione metabolism, plant hormone signal transduction, plant-pathogen interaction, indicating that these pathways were activated by selenite (S4 Table).



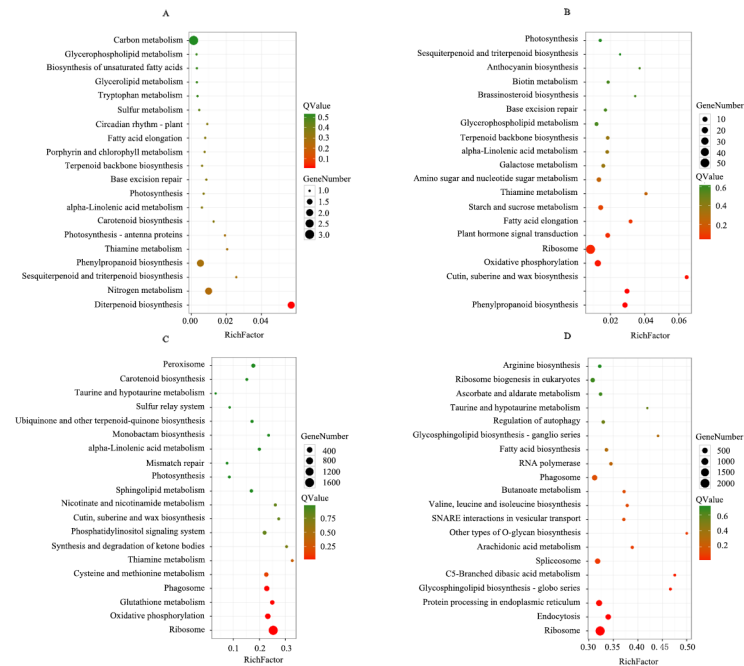

**Fig 5. KEGG enrichment analysis of DEGs in tea plants.** (A) Up-regulated genes in the leaves, (B) down-regulated genes in the leaves, (C) Up-regulated genes in the roots, (D) down-regulated genes in the roots. The x-axis indicates the enrichment factor, and the y-axis shows the KEGG pathway. The color of dot represents the Q-value, and the size of the dot represents the number of genes.

<https://doi.org/10.1371/journal.pone.0197506.g005>

## RT-PCR analysis

To confirm RNA-seq data, 15 genes related with uptake and metabolism, defense and transcription factors in the roots were selected for qRT-PCR analysis. The expression tendency of these genes agreed well with RNA-seq results, which suggested that RNA-seq results were pretty reliable (Fig 6).

## Discussion

Tea plant can enrich Se from the external environment, and the bioavailable form in the leaves is the water-soluble Se. In our study, the content of two leaves and a bud was about 4.67 µg/g (dry weight), based on that water was 73% in the fresh leaves. The dietary reference intake of Se is 50 µg/d for adult humans in China, according to Chinese Nutrition Society. Normally, a healthy adult may drink 6~10g tea per day, and the leaching rate is up to 46.35% [54]. So one can obtain 12.99–21.65 µg Se, which verify that tea is an important source of Se.

The next-generation sequencing technologies are reliable tools to illuminate new genes and their involvement in biochemical pathways in non-model plants. Using RNA-seq, Se-induced genes have been identified in other species [55–56], but little has been known about genes involved in Se uptake, accumulation and tolerance in tea plant until recently. In this study, RNA-seq was employed to investigate Se genes based on expression changes in response to selenite, a predominant form of Se in the tea garden soil, and more than 1000 DEGs were identified in roots and leaves of tea plants. These DEGs, including some genes which had been reported previously, provided candidate genes for further investigating selenite uptake, transport and assimilation in tea plant and other plants. Furthermore, among the assembled

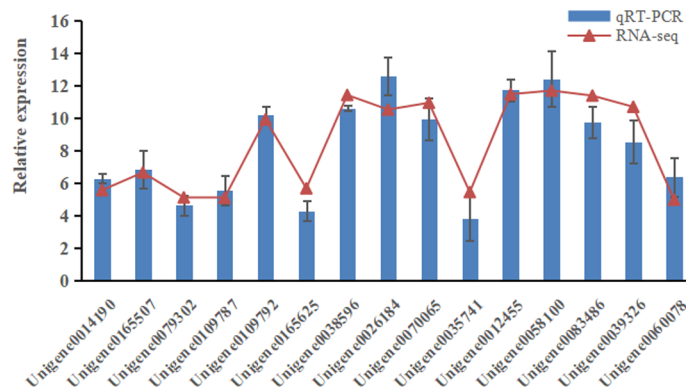

**Fig 6. Verification of relative expression levels of DEGs by qRT-PCR.** Red lines represent the RNA-seq results, while blue bars represent the qRT-PCR results. All qRT-PCR analyses were done in three biological replicates and four technical replicates. Error bars represent standard deviation.

<https://doi.org/10.1371/journal.pone.0197506.g006>

unigenes, 78,806 were not annotated, which provided basic information on the discovery of new transcripts.

### Unigenes related to absorption, transport and metabolism during selenite treatment

Early studies implied that Se mainly as selenate and selenite is transported in plants via S and phosphate (P) transports, respectively. In our study, a comparison of the expression levels of genes encoding ion transporters was made between two treatments with and without selenite. Interestingly, genes encoding phosphate transporters were far more than those encoding sulfate transporters and expressed at significantly higher levels, though the absorption and translocation of selenite were not affected by sulphate [26]. There were 9 genes involved with sulfate transporters (Fig 7B). Besides, 18 phosphate transporter genes were memorably up-expressed in the roots, including mitochondrial phosphate carrier genes, inorganic phosphate transporter genes and phosphate transporter genes (Table 2). Among them, there were 3 up-regulated genes (Unigene0009567, Unigene0115349, Unigene0143441) encoding phosphate transporter PHO1-like protein, which were associated with ion transport between roots and shoots [57]. These results indicated P transporters and S transporters were responsible for the uptake and transport of selenite in tea plants, and P transporters played a more important role.

Once absorbed into cells, Se can take advantage of S assimilation pathway and form into selenocystein and selenomethionine [58]. 34 different S-assimilation genes were significantly differentially expressed, including sulfate permease genes, sulfite reductase, ATP sulfurylase, and genes mediating cysteine and O-acetylserine sulphydrylase/homocysteine synthesis genes in the roots, and 1 S-assimilation gene involved in cysteine synthesis had a higher expression in the leaves. ATP sulfurylase (ATPS) is the first and rate-limiting enzyme in the sulfate metabolic pathway. In our study, *ATPS1* was identified in the roots of tea plants (Fig 7B). There are four *ATPS* genes (*ATPS1-4*) in *Arabidopsis thaliana*, *ATPS2* is located in cytoplasm and plays a major role in the assimilation of selenate. *ATPS1*, 3, 4 are found in plastid and provide *APS* for subsequent reactions but don't participate in the reduction of Se [59]. Sulfite reductase is responsible for the reduction of selenite, and it has been identified to localize to plastids in *Arabidopsis* [60–61]. In leaves, Se accumulation might be related with the up-regulation of the genes encoding cysteine synthase, which was similar to the observations with other species [23, 62]. Moreover, 12 genes encoding selenoprotein were up-regulated in selenite treatment

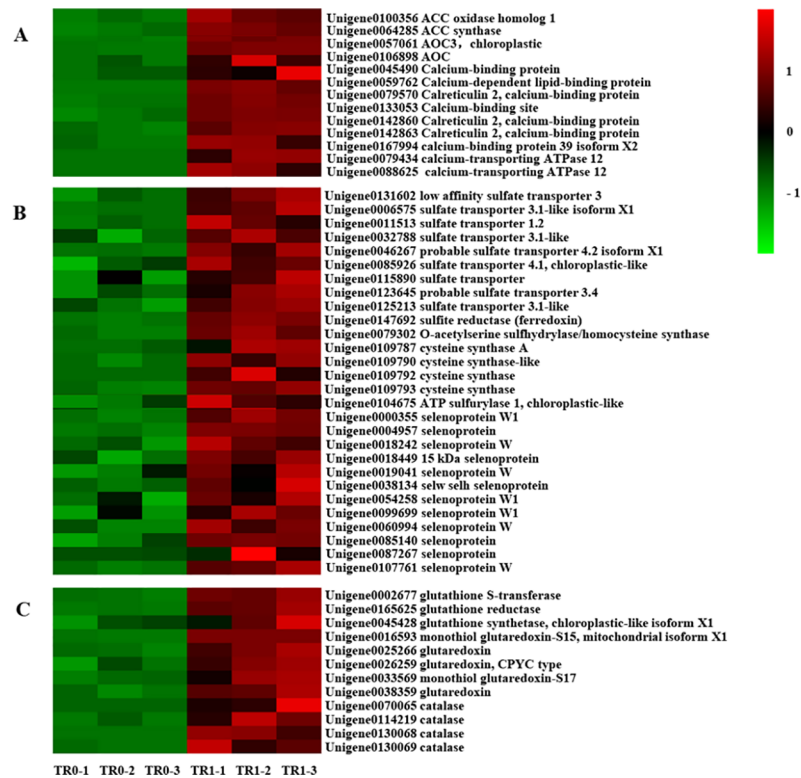

**Fig 7. Heat map diagram of expression patterns for DEGs related with signaling (A), sulfur and selenocompound metabolism (B), antioxidant control genes (C).** Colors show the log<sub>2</sub>(fold change value):the Redder the color,the higher the expression,the greener the color,the lower the expression.TR0-1,TR0-2,TR0-3:roots of control samples;TR1-1,TR1-2,TR1-3:roots of selenite treated samples.

<https://doi.org/10.1371/journal.pone.0197506.g007>

**Table 2. The genes related with phosphate transporters in the roots of tea plants.**

| GeneID         | Tissue | Description                                      | Fold change | P value  |
|----------------|--------|--------------------------------------------------|-------------|----------|
| Unigene0005774 | roots  | mitochondrial phosphate transporter              | 2.835       | 0.0073   |
| Unigene0009567 | roots  | phosphate transporter PHO1 homolog 1             | 1.312       | 2.60E-05 |
| Unigene0009898 | roots  | MC family transporter: phosphate                 | 1.014       | 0.0028   |
| Unigene0012455 | roots  | mitochondrial phosphate carrier 1, minor isoform | 11.493      | 2.55E-12 |
| Unigene0014471 | roots  | mitochondrial phosphate transporter              | 1.267       | 0.0057   |
| Unigene0028463 | roots  | mitochondrial phosphate carrier 1                | 2.674       | 0.0152   |
| Unigene0031729 | roots  | Mitochondrial phosphate carrier protein          | 1.567       | 5.55E-07 |
| Unigene0058100 | roots  | mitochondrial phosphate transporter              | 11.710      | 4.52E-28 |
| Unigene0066161 | roots  | phosphate transporter 1                          | 1.879       | 4.41E-19 |
| Unigene0067345 | roots  | mitochondrial phosphate transporter              | 3.815       | 1.20E-44 |
| Unigene0083486 | roots  | mitochondrial phosphate carrier protein 2        | 11.397      | 6.88E-08 |
| Unigene0083534 | roots  | high affinity inorganic phosphate transporter    | 2.664       | 4.35E-71 |
| Unigene0096431 | roots  | Mitochondrial phosphate carrier protein          | 2.133       | 1.36E-26 |
| Unigene0099537 | roots  | mitochondrial phosphate carrier protein 1        | 1.599       | 2.31E-07 |
| Unigene0115349 | roots  | Phosphate transporter PHO1 -like protein         | 1.764       | 0.0099   |
| Unigene0143441 | roots  | phosphate transporter PHO1-like protein          | 1.624       | 1.65E-24 |
| Unigene0146768 | roots  | phosphate transport protein                      | 2.641       | 0.0022   |
| Unigene0146769 | roots  | phosphate transport protein                      | 3.147       | 7.25E-05 |

<https://doi.org/10.1371/journal.pone.0197506.t002>

(Fig 7B), which was similar to the study by Freeman JL [62]. Selenocysteine was encoded by a UGA opal codon, which was generally a translational stop codon [63]. Selenoproteins that have selenocysteine residues in their catalytic site have been found in many organisms such as humans and bacteria but are rare in higher plants. Surprisingly, several selenoproteins were found in our study, which is worth our continued attention. In addition, 2 genes (Unigene0019110, Unigene0055824) encoding metallothioneins were up-regulated in the roots and 1 gene in the leaves (Unigene0019110). Previous studies have found that metallothioneins could affect metal tolerance and active oxygen scavenging [64].

### Unigenes related to antioxidant enzymes and antioxidant substances responding to selenite treatment

Another possible mechanism of Se tolerance and accumulation in tea plants might be its capacity to reduce or prevent Se-related oxidative stress. In the roots of tea plants grown with selenite treatment, 121 different genes were significantly expressed, encoding glutathione S-transferase (*GST*), glutathione synthetase, glutathione peroxidase, glutathione reductase, glutaredoxin and catalase. Meanwhile, 5 antioxidant-related genes showed significant expression in the leaves, encoding *GST*, catalase and defensin-like protein, which were considered to be Se-responsive genes in *Arabidopsis thaliana* and other Se-rich plants [62, 65]. It was worth mentioning that several *GST* genes were significantly expressed in both roots and leaves, and the highest abundance existed in roots rather than leaves. It was well known that *GST* was able to protect cells from oxidative damages because it could combine excess toxin with glutathion and form, transfer to and separate S-glutathione conjugates in the vacuole [66]. Moreover, in roots, an up-regulated gene (Unigene0045428) encoding glutathione synthetase was deemed to be associated with Se tolerance and accumulation in tea plants. The reason was that *GSH* was related to selenite reduction and led to the absorption of selenite in roots [67]. Besides, 3 genes (Unigene0035324, Unigene0038126, Unigene0093881) encoding *GPX* were up-regulated, which might result in a high tolerance to selenite.

### Unigenes related to plant hormones in response to selenite treatment

Plant hormones are particularly important for nutrient homeostasis [68]. In our study, a certain number of genes in relation to plant hormones were found in roots, including 2 up-regulated genes (Unigene0100356, Unigene0064285) involved in ethylene biosynthesis and 2 up-regulated genes (Unigene0057061, Unigene0106898) involved in JA biosynthesis (Fig 7A). Previous studies have found that the levels of methyl jasmonate (MeJA) and ethylene in young leaves were higher in *S.pinnata* (Se hyperaccumulator) than in *S.albescens* (secondary Se accumulator) with Se treatment [65]. In *Arabidopsis*, several genes related with the synthesis of jasmonate and ethylene were up-regulated in roots with Se treatment, which were proved to be associated with selenite resistance [68]. However, Zhou [31] reported that MeJA could effectively increase the absorption of selenate, but not selenite. In general, ethylene and jasmonate were thought to be “stress hormones”. Ethylene upregulated stress-related genes and JA upregulated both stress-related and S metabolism genes [69–70]. Generally, production of “stress hormones” is triggered by reactive oxygen species (ROS) [65, 71–72]. Under Se treatment, ROS was detected in both Se hyper-accumulator and non-accumulator plants [62, 65, 73]. An interesting thing was that ROS production induced by selenite was more in Col-0 (Se-resistant accession) than in Ws-2 (Se-sensitive accession) [65], which showed that ROS promoted the acquisition of Se resistance in non-accumulator plants. However, excessive ROS may suppress Se resistance. The generation of ROS might be caused by cytosolic calcium [58]. In our study, 9 genes related to calcium signaling, such as calcium-binding protein and calcium transporters

**Table 3. The genes related with transcription factor in the roots of tea plants.**

| GeneID         | Tissue | Description                                               | Fold change | P value  |
|----------------|--------|-----------------------------------------------------------|-------------|----------|
| Unigene0010336 | roots  | Heat Shock transcription factor                           | 4.442       | 6.40E-19 |
| Unigene0039326 | roots  | bZIP transcription factor a                               | 10.709      | 6.39E-09 |
| Unigene0088856 | roots  | myb-related transcription factor                          | 4.823       | 2.10E-20 |
| Unigene0094961 | roots  | transcription factor MYB86                                | 3.949       | 1.43E-12 |
| Unigene0106367 | roots  | ethylene-responsive transcription factor 13-like          | 4.043       | 7.48E-18 |
| Unigene0149192 | roots  | Ethylene-responsive transcription factor WIN1             | 4.674       | 8.46E-27 |
| Unigene0060078 | roots  | AP2 domain-containing transcription factor family protein | 4.994       | 7.43E-09 |

<https://doi.org/10.1371/journal.pone.0197506.t003>

(Fig 7A), were identified in the roots, which was similar to Se-treated *A.thaliana* [74]. A possible mechanism is that the concentration changes of cytosolic calcium can improve NADPH oxidase activity, and trigger ROS generation [58]. However, selenite had an opposite effect on cytokinin and nitric oxide metabolism, and their overproduction led to selenite insensitivity [75]. Plant hormones, especially ethylene and jasmonate, could regulate a defensive network by up-regulating the expression levels of transcriptional factors. The genes encoding the ethylene-responsive factor (*EFR*) family (Unigene0060078, Unigene0106367, Unigene0149192) were identified in roots with selenite treatment. Moreover, two transcription factors belonging to the *MYB* transcription factor family (Unigene0088856, Unigene0094961) were up-regulated. Similarly, selenite treatment also induced the up-regulated expression of a heat shock transcription factor (Unigene0010336) and a bZIP reanscription factor (Unigene0039326) (Table 3). Furthermore, these hormones affected S uptake and assimilation [71], which might be helpful for plants to keep Se from replacing S in proteins [76].

### Conclusion

As suggested by the RNA-seq analysis, selenite was mainly taken up by the phosphate transporters, most of which was stored in the roots of tea plants and then assimilated into organic forms such as selenocysteine through the sulfate assimilation pathway. The process might occur in both roots and leaves, mainly in roots. Selenite could induce substantial up-regulation of genes associated with oxidative stress, which suggested that antioxidant processes played an important role for Se tolerance and accumulation in tea plants. Moreover, hormones might play a signaling role. Our results provide valuable information on the molecular regulation of selenite in tea plant.

### Supporting information

**S1 Fig. Changes of tea plants in response to selenite treatment.** (A) Regular of Se enrichment characteristic in the roots of tea plants (Different letters represent significant difference at 0.01 level). (B) Morphological appearance of tea plant leaves treated with the gradient selenite of 0, 0.015, 0.025, 0.05, 0.1, 0.2, 0.4 mmol/L.  
(TIF)

**S2 Fig. Lenth distribution of *Camellia sinensis* unigenes.**  
(TIFF)

**S3 Fig. Number of significantly DEGs after selenite treatment in roots (TR0-VS-TR1) and leaves (TL0-VS-TL1).** The red bars represent up-regulated genes, and the blue bars represent down-regulated genes (FDR<0.05, |log2ratio|>1).  
(TIFF)

**S4 Fig. Function classifications of GO terms of tea plant leaves transcripts.** The y-axis indicates the number of genes in a subcategory, and the x-axis indicates the different subcategories.

(TIFF)

**S1 Table. Primers used for qRT-PCR.**

(DOCX)

**S2 Table. The results of raw reads filtering.** TL0-1,TL0-2,TL0-3:leaves of control samples; TL1-1,TL1-2,TL1-3:leaves of selenite treated samples;TR0-1,TR0-2,TR0-3:roots of control samples;TR1-1,TR1-2,TR1-3:roots of selenite treated samples.

(DOCX)

**S3 Table. The results of *de novo* assembly.**

(DOCX)

**S4 Table. The most affected pathways and genes in the roots and leaves of tea plants.**

(DOC)

## Acknowledgments

We thank Yaping Li from Guangzhou Gene Denovo Biotechnology Co., Ltd, Guangdong, China for her help in RNA-Seq data analysis.

## Author Contributions

**Data curation:** Zheng Liu.

**Formal analysis:** Rongrong Tan.

**Funding acquisition:** Guiyi Guo.

**Investigation:** Wei Liu.

**Methodology:** Yanli Liu.

**Software:** Linlong Ma.

**Visualization:** Lin Zheng, Fei Ye.

**Writing – original draft:** Dan Cao.

**Writing – review & editing:** Xiaofang Jin.

## References

1. Zhu YG, Pilon-Smits EA, Zhao FJ, Williams PN, Meharg AA. Selenium in higher plants: understanding mechanisms for biofortification and phytoremediation. *Trends in Plant Science*, 2009, 14(8): 436–442. <https://doi.org/10.1016/j.tplants.2009.06.006> PMID: 19665422
2. Zhu JM, Zheng BS, Li SH. The occurrence of selenium poisoning in Enshi city, Hubei province, China. *National Symposium on Medical Geography*, 2010.
3. Winkel LH, Johnson CA, Lenz M, Grundin T, Leupin OX, Amini M, et al. Environmental selenium research: from microscopic processes to global understanding. *Environmental Science and Technology*, 2012, 46(2): 571–579. <https://doi.org/10.1021/es203434d> PMID: 22129299
4. White PJ, Broadley MR. Biofortification of crops with seven mineral elements often lacking in human diets—iron, zinc, copper, calcium, magnesium, selenium and iodine. *New Phytologist*, 2009, 182(1):49–84. <https://doi.org/10.1111/j.1469-8137.2008.02738.x> PMID: 19192191
5. Chen LC, Yang FM, Xu J, Hu Y, Hu QH, Zhang YL, et al. Determination of selenium concentration of rice in China and effect of fertilization of selenite and selenate on selenium content of rice. *Journal of*

- Agricultural and Food Chemistry, 2002, 50(18):5128. <https://doi.org/10.1021/jf0201374> PMID: 12188618
6. Lyons GH, Stangoulis JC, Graham RD. Exploiting micronutrient interaction to optimize biofortification programs: the case for inclusion of selenium and iodine in the HarvestPlus program. *Nutrition Reviews*, 2004, 62(6(1)): 247–252. <https://doi.org/10.1111/j.1753-4887.2004.tb00047.x> PMID: 15291398
  7. Thavarajah D, Ruszkowski J, Vandenberg A. High potential for selenium biofortification of lentils (*Lens culinaris* L.). *Journal of Agricultural and Food Chemistry*, 2008, 56(22):10747–53. <https://doi.org/10.1021/jf802307h> PMID: 18954072
  8. Schiavon M, Dall'acqua S, Mietto A, Pilon-Smits EA, Sambo P, Masi A, et al. Selenium fertilization alters the chemical composition and antioxidant constituents of tomato (*solanum lycopersicon* l.). *Journal of Agricultural and Food Chemistry*, 2013, 61(44), 10542–54. <https://doi.org/10.1021/jf4031822> PMID: 24079300
  9. Hernández-castro E, Trejotéllez LI, Gómezmerino FC, Rodríguezmendoza MN, Sánchez-garcía P, Robledo-paz A, et al. Bioaccumulation of iron, selenium, nitrate, and proteins in chard shoots. *Journal of Soil Science and Plant Nutrition*, 2015, 15(ahead). <https://doi.org/10.4067/S0718-95162015005000047>
  10. Mimmo T, Tiziani R, Valentinuzzi F, Lucini L, Nicoletto C, Sambo P, et al. Selenium biofortification in *Fragaria* × *ananassa*: implications on strawberry fruits quality, content of bioactive health beneficial compounds and metabolomic profile. *Frontiers in Plant Science*, 2017, 8:1887. <https://doi.org/10.3389/fpls.2017.01887> PMCID: PMC5681748 PMID: 29163609
  11. Johnson R, Bryant S, Huntley AL. Green tea and green tea catechin extracts: an overview of the clinical evidence. *Maturitas*, 2012, 73(4):280. <https://doi.org/10.1016/j.maturitas.2012.08.008> PMID: 22986087
  12. Cabrera C, Artacho R, Giménez R. Beneficial effects of green tea—a review. *Journal of the American College of Nutrition*, 2006, 25(2):79. <https://doi.org/10.1080/07315724.2006.10719518> PMID: 16582024
  13. Rains TM, Agarwal S, Maki KC. Antiobesity effects of green tea catechins: a mechanistic review. *Journal of Nutritional Biochemistry*, 2011, 22(1):1–7. <https://doi.org/10.1016/j.jnutbio.2010.06.006> PMID: 21115335
  14. Avs Perumalla, Hettiarachchy NS. Green tea and grape seed extracts-Potential applications in food safety and quality. *Food Research International*, 2011, 44(4):827–839. <https://doi.org/10.1016/j.foodres.2011.01.022>
  15. Xiang CG, Li WF, Ren H, Wu SP, Huang FP. Selenium content determination in edible parts of crops in zhangjiajie city. *natural product research and development*, 2012, 24(8):1084–1088 <https://doi.org/10.16333/J.1001-6880.2012.08.016>
  16. Gong XZ, Ouyang Z, Cai DR. The organic states of selenium in selenium-rich teas and garlics. *Natural Product Research and Development*, 1996(1):59–62.
  17. Wen LX, Guo YL. Research Progress of Selenium-enriched Tea in China. *Chinese Journal of Tropical Crops*, 2013, 34(1):201–206. <https://doi.org/10.3969/j.issn.1000-2561.2013.01.036>
  18. Elrashidi MA, Adriano DC, Workman SM, Lindsay ML. Chemical equilibria of selenium in soils: a theoretical development. *Soil Science*, 1987, 144(2):274–280.
  19. White PJ, Bowen HC, Parmaguru P, Fritz M, Spracklen WP, Spiby RE, et al. Interactions between selenium and sulphur nutrition in *Arabidopsis thaliana*. *Journal of Experimental Botany*, 2004, 55(404):1927–1937. <https://doi.org/10.1093/jxb/erh192> PMID: 15258164
  20. Sors TG, Ellis DR, Salt DE. Selenium uptake, translocation, assimilation and metabolic fate in plants. *Photosynthesis Research*, 2005, 86:373–389. <https://doi.org/10.1007/s11120-005-5222-9> PMID: 16307305
  21. El Eassis E, Cathala N, Rouached H, Fourcroy P, Berthomieu P, Terry N, et al. Characterization of a selenate-resistant *Arabidopsis* mutant. Root growth as a potential target for selenate toxicity. *Plant Physiology*, 2007, 143(3):1231–41. <https://doi.org/10.1104/pp.106.091462> PMID: 17208959 PMCID: PMC1820920
  22. Hopkins L, Parmar S, Bouranis DL, Howarth JR, Hawkesford MJ. Coordinated expression of sulfate uptake and components of the sulfate assimilatory pathway in maize. *Plant Biology*, 2004, 6(4):408–414. <https://doi.org/10.1055/s-2004-820872> PMID: 15248123
  23. Cabannes E, Buchner P, Broadley MR, Hawkesford MJ. A comparison of sulfate and selenium accumulation in relation to the expression of sulfate transporter genes in *Astragalus* species. *Plant Physiology*, 2011, 157(4):2227–39. <https://doi.org/10.1104/pp.111.183897> PMID: 21972267 PMCID: PMC3327195

24. Zhang LH, Shi WM, Wang XC. Difference in selenium accumulation in shoots of two rice cultivars. *Pedosphere*, 2006, 16(5):646–653.
25. Liu XW, Zhao ZQ, Hu CX, Zhao XH, Guo ZH. Effect of sulphate on selenium uptake and translocation in rape (*Brassica napus* L.) supplied with selenate or selenite. *Plant and Soil*, 2016, 399(1–2):295–304. <https://doi.org/10.1007/s11104-015-2699-7>
26. Shrift A, Ulrich JM. Transport of selenate and selenite into *astragalus* roots. *Plant Physiology*, 1969, 44(6):893–896. PMID: 5799050 PMCID: PMC396182
27. Zhao XQ, Mitani N, Yamaji N, Shen RF, Ma JF. Involvement of silicon influx transporter OsNIP 2;1 in selenite uptake in rice. *Plant Physiology*, 2010, 153:1871–1877. <https://doi.org/10.1104/pp.110.157867> PMID: 20498338 PMCID: PMC2923891
28. Zhang LH, Hu B, Li W, Che RH, Deng K, Li H, et al. OsPT2, a phosphate transporter, is involved in the active uptake of selenite in rice. *New Phytologist*, 2014, 201(4):1183. <https://doi.org/10.1111/nph.12596> PMID: 24491113 PMCID: PMC4284032
29. Song ZP, Shao HF, Huang HG, Shen Y, Wang LZ, Wu FY, et al. Overexpression of the phosphate transporter gene OsPT8, improves the Pi and selenium contents in *Nicotiana tabacum*. *Environmental and Experimental Botany*, 2017, 137:158–165. <https://doi.org/10.1016/j.envexpbot.2017.02.011>
30. Hu YR, Yue C, Zhou C, Huang YT, Cao HL, Hao XY, et al. Cloning and expression analysis of sulfate transporter CsSUL3.5 gene in tea plant. *Acta Horticulturae Sinica*, 2015, 42(11):2306–2314.
31. Zhou W, Wei CX, Wei W. Influence of methyl jasmonate on se content and quality of selenium-enriched spring tea. *Journal of Mountain Agriculture and Biology*, 2012, 31(6):514–518.
32. Huang J. Effects of selenium on tea antioxidant system and se enrichment characteristics among tea varieties. Huazhong agricultural university, 2014.
33. Zhao H, Huang J, Li Y, Song XW, Luo JL, Yu Z, et al. Natural variation of selenium concentration in diverse tea plant (*Camellia sinensis*) accessions at seedling stage. *Scientia Horticulturae*, 2016, 198:163–169. <https://doi.org/10.1016/j.scienta.2015.11.026>
34. Elberse IAM, van Damme JMM, van Tienderen PH. Plasticity of growth characteristics in wild barley (*Hordeum spontaneum*) in response to nutrient limitation. *Journal of Ecology*, 2003, 91(3):371–382. <https://doi.org/10.1046/J.1365-2745.2003.0076.X>
35. Harinasut P, Poonsopa D, Roengmongkol K, Charoensataporn R. Salinity effects on antioxidant enzymes in mulberry cultivar. *Scienceasia*, 2003, 29:109–113. <https://doi.org/10.2306/scienceasia1513-1874.2003.29.109>
36. Nakano Y, Asada K, Nakano Y. Hydrogen-peroxide is scavenged by ascorbate-specific peroxidase in spinach chloroplasts. *Plant and Cell Physiology*, 1981, 22(5):867–880. <https://doi.org/10.1093/oxfordjournals.pcp.a076232>
37. Chance B, Maehly AC. Assay of catalase and peroxidase. *Methods in enzymology*, 1955, 2:764–775. [https://doi.org/10.1016/S0076-6879\(55\)02300-8](https://doi.org/10.1016/S0076-6879(55)02300-8)
38. Aebi H. Catalase in vitro. *Methods in enzymology*. 1984, 105:121–126. [https://doi.org/10.1016/S0076-6879\(84\)05016-3](https://doi.org/10.1016/S0076-6879(84)05016-3) PMID: 6727660
39. Grabherr MG, Haas BJ, Yassour M, Levin JZ, Thompson DA, Amit I, et al. Full-length transcriptome assembly from RNA-Seq data without a reference genome. *Nature Biotechnology*, 2011, 29(7):644. <https://doi.org/10.1038/nbt.1883> PMID: 21572440 PMCID: PMC3571712
40. Mortazavi A, Williams BA, Mccue K, Schaeffer L, Wold B. Mapping and quantifying mammalian transcriptomes by RNA-Seq. *Nature Methods*, 2008, 5(7): 621–628. <https://doi.org/10.1038/nmeth.1226> PMID: 18516045
41. Rajkumar AP, Qvist P, Lazarus R, Lescai F, Ju J, Nyegaard M, et al. Experimental validation of methods for differential gene expression analysis and sample pooling in RNA-seq. *BMC Genomics* 2015, 16(1): 548. <https://doi.org/10.1186/s12864-015-1767-y> PMCID: PMC4515013 PMID: 26208977
42. Conesa A, Gotz S, Garcia-Gomez JM, Terol J, Talon M, Robles M. Blast2GO: a universal tool for annotation, visualization and analysis in functional genomics research. *Bioinformatics*, 2005, 21(18):3674–3676. <https://doi.org/10.1093/bioinformatics/bti610> PMID: 16081474
43. Ye J, Fang L, Zheng HK, Zhang Y, Chen J, Zhang ZJ, et al. WEGO: a web tool for plotting GO annotations. *Nucleic Acids Research*, 2006, 34(Web Server issue):293–7. <https://doi.org/10.1093/nar/gkl031> PMID: 16845012 PMCID: PMC1538768
44. Iseli C, Jongeneel CV, Bucher P. ESTScan: a program for detecting, evaluating, and reconstructing potential coding regions in EST sequences. *Proceeding*, 1999, 99(2):138–158. PMID: 10786296
45. Jin JP, Zhang H, Kong L, Gao G, Luo JC. PlantTFDB 3.0: a portal for the functional and evolutionary study of plant transcription factors. *Nucleic Acids Research*, 2014, 42(Database issue):1182–7. <https://doi.org/10.1093/nar/gkt1016> PMID: 24174544 PMCID: PMC3965000



46. Kenneth J, Livak TD. Analysis of relative gene expression data using real-time quantitative PCR and the 2- $\Delta\Delta$ CT method. *Methods*, 2001. <https://doi.org/10.1006/meth.2001.1262> PMID: 11846609
47. Wang XF, Zhang L, Wan YN, Wang Q, Sun HJ, Guo YB, et al. Effects of foliar-applied selenite and selenate on selenium accumulation in strawberry. *Journal of Agricultural Resources and Environment*, 2016, 33(4):334–339. <https://doi.org/10.13254/j.jare.2016.0023>
48. Chen SY, Jiang RF, Li HF. Uptake and Translocation of Selenate or Selenite by Wheat and Rice Seedlings. *Environmental Science*, 2011, 32(1):284–289. PMID: 21404700
49. Keskinen R, Turakainen M, Hartikainen H. Plant availability of soil selenate and selenium distribution within wheat and ryegrass. *Plant and Soil*, 2010, 333(1–2):301–313. <https://doi.org/10.1007/s11104-010-0345-y>
50. Foyer CH, Noctor G. Oxidant and antioxidant signalling in plants: a re-evaluation of the concept of oxidative stress in a physiological context. *Plant Cell and Environment*, 2005, 28(8):1056–1071. <https://doi.org/10.1111/j.1365-3040.2005.01327.X>
51. Bhatt I, Tripathi BN. Plant peroxiredoxins: catalytic mechanisms, functional significance and future perspectives. *Biotechnology Advances*, 2011, 29(6):850. <https://doi.org/10.1016/j.biotechadv.2011.07.002> PMID: 21777667
52. Shigeoka S, Ishikawa T, Tamoi M, Miyagawa Y, Takeda T, Yabuta Y et al. Regulation and function of ascorbate peroxidase isoenzymes. *Journal of Experimental Botany*, 2002, 53(372):1305–1319. PMID: 11997377
53. Li CY, Shi L, Chen DD, Ren A, Gao T, Zhao MW. Functional analysis of the role of glutathione peroxidase (GPX) in the ROS signaling pathway, hyphal branching and the regulation of ganoderic acid biosynthesis in *Ganoderma lucidum*. *Fungal Genetics and Biology Fg & B*, 2015, 82:168–180. <https://doi.org/10.1016/j.fgb.2015.07.008> PMID: 26216672
54. Xie JP. Study on the dissolved rate of selenium and combined of selenium in selenium-riched tea with hydride generation-atomic fluorescence method. *Food Research and Development*, 2016, 37(9):156–159. <https://doi.org/10.3969/J.ISSN.1005-6521.2016.09.036>
55. Cakir O, Candar-Cakir B, Zhang B. Small RNA and degradome sequencing reveals important micro-RNA function in *Astragalus chrysochlorus* response to selenium stimuli. *Plant Biotechnology Journal*, 2016, 14(2):543–556. <https://doi.org/10.1111/pbi.12397> PMID: 25998129
56. Çakır Ö, Turgutkara N, Ari Ş, Zhang BH. *De novo* transcriptome assembly and comparative analysis elucidate complicated mechanism regulating *Astragalus chrysochlorus* response to selenium stimuli. *Plos One*, 2015, 10(10):e0135677. <https://doi.org/10.1371/journal.pone.0135677> PMID: 26431547 PMCID: PMC4592229
57. Arpat AB, Magliano P, Wege S, Rouached H, Stefanovic A, Poirier Y. Functional expression of PHO1 to the Golgi and trans-Golgi network and its role in export of inorganic phosphate. *Plant Journal*, 2012, 71(3):479–491. <https://doi.org/10.1111/j.1365-313X.2012.05004.x> PMID: 22449068
58. Pilon-Smits EA, Winkel LHE, Lin ZQ. Selenium in plants. Springer International Publishing, 2017.
59. Hatzfeld Y, Lee S, Lee M, Leustek T, Saito K. Functional characterization of a gene encoding a fourth ATP sulfurylase isoform from *Arabidopsis thaliana*. *Gene*, 2000, 248(1–2):51–58. [https://doi.org/10.1016/S0378-1119\(00\)00132-3](https://doi.org/10.1016/S0378-1119(00)00132-3) PMID: 10806350
60. White PJ. Selenium accumulation by plants. *Annals of Botany*, 2016, 117(2):217–235. <https://doi.org/10.1093/aob/mcv180> PMID: 26718221 PMCID: PMC4724052
61. Bork C, Schwenn JD, Hell R. Isolation and characterization of a gene for assimilatory sulfite reductase from *Arabidopsis thaliana*. *Gene*, 1998, 212:147–153. [https://doi.org/10.1016/S0378-1119\(98\)00155-3](https://doi.org/10.1016/S0378-1119(98)00155-3) PMID: 9661674
62. Freeman JL, Tamaoki M, Stushnoff C, Quinn CF, Cappa JJ, Devonshire J, et al. Molecular mechanisms of selenium tolerance and hyperaccumulation in *Stanleya pinnata*. *Plant Physiology*, 2010, 153(4):1630–52. <https://doi.org/10.1104/pp.110.156570> PMID: 20498337 PMCID: PMC2923907
63. Fu LH, Wang XF, Eyal Y, She YM, Donald LJ, Standing KG, et al. A selenoprotein in the plant kingdom: mass spectrometry confirms that an opal codon (UGA) encodes selenocysteine in *Chlamydomonas reinhardtii* glutathione peroxidase. *Journal of Biological Chemistry*, 2002, 277:25983–25991. <https://doi.org/10.1074/jbc.M202912200> PMID: 11973339
64. Cobbett C, Goldsbrough P. Phytochelatin and metallothioneins: roles in heavy metal detoxification and homeostasis. *Annual Review of Plant Biology*, 2002, 53(1):159. <https://doi.org/10.1146/annurev.arplant.53.100301.135154> PMID: 12221971
65. Tamaoki M, Freeman JL, Pilon-Smits EA. Cooperative ethylene and jasmonic acid signaling regulates selenite resistance in *Arabidopsis*. *Plant Physiology*, 2008, 146(3):1219. <https://doi.org/10.1104/pp.107.110742> PMID: 18178671 PMCID: PMC2259059

66. Huang CF, Yamaji N, Chen Z, Ma JF. A tonoplast-localized half-size ABC transporter is required for internal detoxification of aluminum in rice. *Plant Journal*, 2012, 69(5):857. <https://doi.org/10.1111/j.1365-313X.2011.04837.x> PMID: 22035218
67. Zhang LH, Yu FY, Shi WM, Li YJ, Miao YF. L-cysteine stimulates selenite uptake through GSH involving in selenite reduction in rice roots. *Journal of Plant Nutrition*, 2015, 38(5):768–779. <https://doi.org/10.1080/01904167.2014.939287>
68. Koprivova A, Kopriva S. Hormonal control of sulfate uptake and assimilation. *Plant Molecular Biology*, 2016, 91(6):617. <https://doi.org/10.1007/s11103-016-0438-y> PMID: 26810064
69. Lorenzo O, Solano R. Molecular players regulating the jasmonate signalling network. *Current Opinion in Plant Biology*, 2005, 8(5):532–540. <https://doi.org/10.1016/j.pbi.2005.07.003> PMID: 16039901
70. Sasaki-sekimoto Y, Taki N, Obayashi T, Aono M, Matsumoto F, Sakurai N, et al. Coordinated activation of metabolic pathways for antioxidants and defence compounds by jasmonates and their roles in stress tolerance in *Arabidopsis*. *Plant Journal*, 2005, 44(4):653. <https://doi.org/10.1111/j.1365-313X.2005.02560.x> PMID: 16262714
71. Dong X. SA, JA, ethylene, and disease resistance in plants. *Current Opinion in Plant Biology*, 1998, 1(4):316. [https://doi.org/10.1016/1369-5266\(88\)80053-0](https://doi.org/10.1016/1369-5266(88)80053-0) PMID: 10066607
72. Overmyer K, Brosché M, Kangasjärvi J. Reactive oxygen species and hormonal control of cell death. *Trends in Plant Science*, 2003, 8(7):335–342. [https://doi.org/10.1016/S1360-1385\(03\)00135-3](https://doi.org/10.1016/S1360-1385(03)00135-3) PMID: 12878018
73. Gomes-Junior RA, Gratao PL, Gaziola SA, Mazzafera P, Lea PJ, Azevedo RA. Selenium-induced oxidative stress in coffee cell suspension cultures. *Functional Plant Biology*, 2007, 34(5):449–456. <https://doi.org/10.1071/FP07010> PMID: 21046200
74. Van Hoewyk D, Takahashi H, Inoue E, Hess A, Tamaoki M, Pilon-Smits EA. Transcriptome analyses give insights into selenium-stress responses and selenium tolerance mechanisms in *Arabidopsis*. *Physiologia Plantarum*, 2008, 132(2):236–253. <https://doi.org/10.1111/j.1399-3054.2007.01002.x> PMID: 18251864
75. Lehotai N, Feigl G, Koos A, Molnar A, Ordog A, Peto A, et al. Nitric oxide–cytokinin interplay influences selenite sensitivity in *Arabidopsis*. *Plant Cell Reports*, 2016, 35(10):1–15. <https://doi.org/10.1007/s00299-016-2028-5> PMID: 27449496
76. Pilon-Smits EA. Selenium in plants. *Plant Ecophysiology*, 2015. [https://doi.org/10.1007/978-3-319-08807-5\\_4](https://doi.org/10.1007/978-3-319-08807-5_4)
